# Supplementary material for: Prevalence and risk factors for diabetic retinopathy in rural India. Sankara Nethralaya Diabetic Retinopathy Epidemiology and Molecular Genetic Study III (SN-DREAMS III), report no 2
Source: PubMed Central journal article supplement — BMJ Open Diabetes Res Care. 2014 Jun 6;2(1):e000005. doi: 10.1136/bmjdrc-2013-000005 (PMC4212556; doi:10.1136/bmjdrc-2013-000005), 2014-06-06
Supplement: bmjdrc-2013-000005-s1.pdf [file bmjdrc-2013-000005-s1.pdf]

Supplemental Table 1: Diabetic Retinopathy in newly diagnosed diabetes

| Sno.                                         | Study details                                                                                                                                                                                                                                                                                                                                                                 | N (newly diagnosed) | Prevalence of STDR  |
|----------------------------------------------|-------------------------------------------------------------------------------------------------------------------------------------------------------------------------------------------------------------------------------------------------------------------------------------------------------------------------------------------------------------------------------|---------------------|---------------------|
| 1                                            | 2012, urban population, India<br><i>Raman R, Gupta A, Krishna S, Kulothungan V, Sharma T. Prevalence and risk factors for diabetic microvascular complications in newly diagnosed type II diabetes mellitus. Sankara Nethralaya Diabetic Retinopathy Epidemiology and Molecular Genetic Study (SN-DREAMS, report 27). J Diabetes Complications. 2012 Mar-Apr;26(2):123-8.</i> | 248                 | 1/248 (0.4%)        |
| 2                                            | 2011, rural population, Korea<br><i>Kim JH, Kwon HS, Park YM, Lee JH, Kim MS, Yoon KH, Lee WC, Cha BY, Son HY. Prevalence and associated factors of diabetic retinopathy in rural Korea: the Chungju metabolic disease cohort study. J Korean Med Sci. 2011 Aug;26(8):1068-73.</i>                                                                                            | 291                 | 7/291 (2.4%)        |
| 3                                            | 2009, rural population, India<br><i>Rani PK, Raman R, Chandrakantan A, Pal SS, Perumal GM, Sharma T. Risk factors for diabetic retinopathy in self-reported rural population with diabetes. J Postgrad Med. 2009 Apr-Jun;55(2):92-6.</i>                                                                                                                                      | 659                 | 17/659 (2.58%)      |
| 4                                            | 2013, urban clinic based, Jordan<br><i>Jammal H, Khader Y, Alkhatib S, Abujbara M, Alomari M, Ajlouni K. Diabetic retinopathy in patients with newly diagnosed type 2 diabetes mellitus in Jordan: Prevalence and associated factors. J Diabetes. 2013 Jun;5(2):172-9.</i>                                                                                                    | 127                 | 4/127 (3.15%)       |
| 5                                            | 2012, national database, Scotland<br><i>Jammal H, Khader Y, Alkhatib S, Abujbara M, Alomari M, Ajlouni K. Diabetic retinopathy in patients with newly diagnosed type 2 diabetes mellitus in Jordan: Prevalence and associated factors. J Diabetes. 2013 Jun;5(2):172-9.</i>                                                                                                   | 51526               | 1.9%                |
| 6                                            | <b>Present study</b>                                                                                                                                                                                                                                                                                                                                                          | <b>325</b>          | <b>0.6% (2/325)</b> |
| STDR: Sight threatening diabetic retinopathy |                                                                                                                                                                                                                                                                                                                                                                               |                     |                     |
